# Supplementary material
Source: publisher figshare collection journal article supplement (https://geolsoc.figshare.com/ndownloader/files/5423783)
Supplement: Supplementary file 1 [file 5423783]

River	n	Mean A [m]	Mean B [m]	Mean B/A	Mean Channel Width [m]	� Sin.
Taloqan	14	442	124	0.29	238	1.25
Lat. / Long.
36.696 / 69.152
36.833 / 68.734
Christian River	43	236	86	0.37	126	2.6
Lat. / Long.
67.179 / -145.37
66.634 / -145.828
Nenana River	21	462	141	0.31	506	1.09
Lat. / Long.
64.173 / -149.264
64.529 / -149.138
Bermejo	55	820	199	0.25	497	1.64
Lat. / Long.
-23.293 / -64.074
-27.368 / -58.774
Diamante	58	104	28	0.28	50	?
Lat. / Long.
-34.603 / -68.472
-36.965 / -66.911
Arroyo Valcheta	4	619	145	0.23	249	1.16
Lat. / Long.
-28.658 / -65.797
-29.168 / -65.896
Paran�	19	5507	1553	0.28	3866	1.44
Lat. / Long.
-27.482 / -57.034
-29.962 / -59.513
Warburton	18	164	36	0.22	53	1.81
Lat. / Long.
-27.288 / 138.55
-27.908 / 137.184
Murray	31	280	63	0.23	156	2.58
Lat. / Long.
-35.813 / 145.467
-34.813 / 143.358
Rudall	7	163	37	0.23	51	1.19
Lat. / Long.
-22.353 / 122.734
-22.176 / 122.996
Rapulo	18	587	128	0.22	192	1.71
Lat. / Long.
-15.074 / -66.873
-14.063 / -66.269
Paraguay	9	589	171	0.28	459	3.05
Lat. / Long.
-16.566 / -57.838
-17.46 / -57.94
Black Canyon Wash	14	48	12	0.24	21	1.05
Lat. / Long.
34.999 / -115.344
34.739 / -115.261
Logone	39	1346	341	0.25	511	1.34
Lat. / Long.
9.562 / 16.185
10.495 / 15.71
Maule trib (Chile)	21	344	77	0.22	138	1.23
Lat. / Long.
-36.237 / -71.525
-35.83 / -71.822
Brahmaputra	14	1093	323	0.28	817	1.13
Lat. / Long.
28.07 / 95.355
27.696 / 95.281
Jaldhaka	19	924	271	0.3	455	0.64
Lat. / Long.
26.852 / 88.992
26.528 / 89.122
Halil Rud	22	71	14	0.2	N/A	1.13
Lat. / Long.
28.687 / 58.552
28.953 / 58.769
Aksu	21	52	14	0.28	48	?
Lat. / Long.
45.95 / 78.472
46.321 / 78.212
Unnamed	84	207	61	0.3	98	2.05
(Mongolia)
Lat. / Long.
50.546 / 94.473
50.538 / 93.034
Limpopo (incised)	36	213	56	0.27	123	1.51
Lat. / Long.
-23.096 / 32.215
-24.385 / 33.489
Nhandugue	10	381	83	0.22	182	1.48
Lat. / Long.
-18.482 / 34.384
-18.772 / 34.566
Zambezi	12	871	177	0.24	574	1.49
Lat. / Long.
-17.49 / 24.268
-17.777 / 25.161
Yedseram	24	168	42	0.25	122	?
Lat. / Long.
11.519 / 13.677
11.898 / 13.813
Sokoto	33	170	39	0.23	122	1.26
Lat. / Long.
11.552 / 4.22
11.283 / 4.242
unnamed (Oman)	36	267	81	0.31	182	1.09
Lat. / Long.
23.467 / 57.83
23.734 / 57.832
Pucheveyem	40	552	163	0.3	243	1.42
Lat. / Long.
67.967 / 170.995
68.582 / 170.615
unnamed (Russia)	26	1359	380	0.29	683	1.84
Lat. / Long.
63.954 / 175.652
64.377 / 176.047
Okhotka	43	475	144	0.3	269	1.3
Lat. / Long.
59.602 / 142.775
59.331 / 143.072
Urmi	9	538	157	0.3	256	1.6
Lat. / Long.
49.141 / 133.483
48.665 / 133.855
Baysh	22	45	12	0.28	31	1.07
Lat. / Long.
17.437 / 42.566
17.125 / 42.439
Kyom	17	561	163	0.3	218	2.98
Lat. / Long.
9.168 / 26.994
9.384 / 28.038
Choshui His	41	176	46	0.27	100	1.07
Lat. / Long.
23.788 / 120.617
23.852 / 120.228
Surkhob	8	304	87	0.28	312	1.79
Lat. / Long.
37.883 / 68.938
37.612 / 68.556
Murgap	28	46	12	0.27	26	1.27
Lat. / Long.
37.224 / 62.402
38.737 / 61.27
Meta	59	666	173	0.26	361	2.46
Lat. / Long.
7.043 / -72.054
6.76 / -70.5
unnamed (Zambia)	12	235	66	0.3	143	1.29
Lat. / Long.
-12.819 / 31.668
-12.992 / 31.894
Amanzamnyama	16	187	45	0.24	83	1.25
Lat. / Long.
-19.811 / 26.978
-19.745 / 26.588
River	River Definition	Gradient	Tectonic Setting	Climate Catchment	Climate Basin	Tributary/ Distributary
Taloqan	Braided	0.003524421	foreland	drylands/ subtropical	drylands	Tributary
Lat. / Long.
36.696 / 69.152
36.833 / 68.734
Christian River	Meandering	0.001220247	piggy-back/foreland	polar/ continental	continental	Distributary
Lat. / Long.
67.179 / -145.37
66.634 / -145.828
Nenana River	Braided	0.002781775	foreland	polar/ continental	continental	Tributary
Lat. / Long.
64.173 / -149.264
64.529 / -149.138
Bermejo	Meandering	0.000197451	foreland to Cordillera Oriental	polar/ subtropical	tropical	Distributary
Lat. / Long.
-23.293 / -64.074
-27.368 / -58.774
Diamante	?	0.001489449	foreland	polar/ subtropical	drylands	Tributary
Lat. / Long.
-34.603 / -68.472
-36.965 / -66.911
Arroyo Valcheta	Braided	0.00260078	foreland	subtropical	tropical	Tributary
Lat. / Long.
-28.658 / -65.797
-29.168 / -65.896
Paran�	Meandering	5.31E-05	cratonic	tropical	tropical	Distributary
Lat. / Long.
-27.482 / -57.034
-29.962 / -59.513
Warburton	Meandering	9.89E-05	cratonic	drylands	drylands	Distributary
Lat. / Long.
-27.288 / 138.55
-27.908 / 137.184
Murray	Meandering	5.46E-05	cratonic	drylands/ subtropical	drylands	Distributary
Lat. / Long.
-35.813 / 145.467
-34.813 / 143.358
Rudall	Braided	0.000802476	cratonic	drylands	drylands	Distributary
Lat. / Long.
-22.353 / 122.734
-22.176 / 122.996
Rapulo	Meandering	0.000256652	foreland to Cordillera Oriental	drylands	tropical	Tributary
Lat. / Long.
-15.074 / -66.873
-14.063 / -66.269
Paraguay	Meandering	0.000110633	foreland (off peripheral bulge?)	tropical	tropical	Distributary
Lat. / Long.
-16.566 / -57.838
-17.46 / -57.94
Black Canyon Wash	Braided	0.019447367	strike-slip/extensional	drylands	drylands	Distributary
Lat. / Long.
34.999 / -115.344
34.739 / -115.261
Logone	Meandering	0.000141778	cratonic	tropical	drylands	Distributary
Lat. / Long.
9.562 / 16.185
10.495 / 15.71
Maule trib (Chile)	Braided	0.005334993	compressional (forearc - Andean)	polar/ subtropical	subtropical	Tributary
Lat. / Long.
-36.237 / -71.525
-35.83 / -71.822
Brahmaputra	Braided	0.000695984	foreland (Himalayas)	polar/ continental	subtropical	Distributary
Lat. / Long.
28.07 / 95.355
27.696 / 95.281
Jaldhaka	Braided	0.000414019	foreland (Himalayas)	polar/ continental	subtropical	Distributary
Lat. / Long.
26.852 / 88.992
26.528 / 89.122
Halil Rud	Braided	0.013087532	piggy-back	drylands	drylands	Tributary
Lat. / Long.
28.687 / 58.552
28.953 / 58.769
Aksu	?	0.000477631	foreland	continental	drylands	Distributary
Lat. / Long.
45.95 / 78.472
46.321 / 78.212
Unnamed	Meandering	0.000857181	piggy-back	drylands	drylands	Distributary
(Mongolia)
Lat. / Long.
50.546 / 94.473
50.538 / 93.034
Limpopo (incised)	Meandering	0.000354086	extensional (rift shoulder/pass marg)	tropical/ drylands	tropical	Tributary
Lat. / Long.
-23.096 / 32.215
-24.385 / 33.489
Nhandugue	Meandering	0.001262916	extensional (rift shoulder/pass marg)	tropical	tropical	Distributary
Lat. / Long.
-18.482 / 34.384
-18.772 / 34.566
Zambezi	Meandering	7.18E-05	cratonic	tropical/ drylands	drylands	Tributary
Lat. / Long.
-17.49 / 24.268
-17.777 / 25.161
Yedseram	?	0.000390472	cratonic (failed rift)	tropical	tropical	Tributary
Lat. / Long.
11.519 / 13.677
11.898 / 13.813
Sokoto	Braided	0.000262182	cratonic (failed rift)	drylands	drylands	Distributary
Lat. / Long.
11.552 / 4.22
11.283 / 4.242
unnamed (Oman)	Braided	0.007105733	compressional (edge of Zagros)	drylands	drylands	Distributary
Lat. / Long.
23.467 / 57.83
23.734 / 57.832
Pucheveyem	Meandering	0.001355448	cratonic	continental	continental	Tributary
Lat. / Long.
67.967 / 170.995
68.582 / 170.615
unnamed (Russia)	Meandering	4.46E-05	cratonic	polar	polar	Distributary
Lat. / Long.
63.954 / 175.652
64.377 / 176.047
Okhotka	Meandering	0.00147144	passive margin	continental	continental	Distributary
Lat. / Long.
59.602 / 142.775
59.331 / 143.072
Urmi	Meandering	0.000676679	strike-slip	continental	continental	Distributary
Lat. / Long.
49.141 / 133.483
48.665 / 133.855
Baysh	Braided	0.003076247	extensional (passive margin)	drylands	drylands	Distributary
Lat. / Long.
17.437 / 42.566
17.125 / 42.439
Kyom	Meandering	0.000116431	cratonic	tropical	tropical/ drylands	Distributary
Lat. / Long.
9.168 / 26.994
9.384 / 28.038
Choshui His	Braided	0.002133672	compressional (subduction-related)	tropical	tropical	Distributary
Lat. / Long.
23.788 / 120.617
23.852 / 120.228
Surkhob	Meandering	0.001778173	extensional (rift fill - lateral)	tropical/ drylands	drylands	Distributary
Lat. / Long.
37.883 / 68.938
37.612 / 68.556
Murgap	Braided	0.000405022	foreland	cont/ subtrop/dry	drylands	Distributary
Lat. / Long.
37.224 / 62.402
38.737 / 61.27
Meta	Meandering	0.000431906	foreland to Venezuelan Andes	tropical/ subtropical	tropical	Tributary
Lat. / Long.
7.043 / -72.054
6.76 / -70.5
unnamed (Zambia)	Braided	0.001376879	extensional (rift fill - lateral)	tropical	tropical	Distributary
Lat. / Long.
-12.819 / 31.668
-12.992 / 31.894
Amanzamnyama	Braided	0.001101284	cratonic (incipient rift?)	drylands	drylands	Distributary
Lat. / Long.
-19.811 / 26.978
-19.745 / 26.588
